# Supplementary material for: Proximate, Physicochemical, Techno-Functional and Antioxidant Properties of Three Edible Insect (Gonimbrasia belina, Hermetia illucens and Macrotermes subhylanus) Flours
Source: MDPI journal article supplement (doi:10.3390/foods11070976), 2022-03-28
Supplement: s1 [file s1]

**Table S1:** Principal components for illustrating the interpretation in Figure 5.

| <b>Variables</b>                                              | <b>PC1</b> | <b>PC2</b> | <b>PC3</b> |
|---------------------------------------------------------------|------------|------------|------------|
| EC(%)                                                         | .960       | .104       | .089       |
| Fe Chelation (%)                                              | .949       | .134       | -.181      |
| ES(%)                                                         | .897       | -.307      | .125       |
| DPPH-RS (%)                                                   | -.897      | .184       | .179       |
| RP (abs nm)                                                   | .821       | .426       | .247       |
| WBC (g.g <sup>-1</sup> )                                      | -.820      | .515       | .106       |
| FS (%)                                                        | -.043      | .837       | .155       |
| FC (%)                                                        | .112       | -.800      | .504       |
| ABTS-RS (%)                                                   | -.524      | -.531      | .442       |
| OBC (g.g <sup>-1</sup> )                                      | .269       | .496       | .745       |
| Where, PC1, PC2 and PC3 are first three Principal components. |            |            |            |
